# Supplementary material
Source: PubMed Central journal article supplement (PMC5928798)
Supplement: NIHMS959969-supplement-supplement_1.pdf [file NIHMS959969-supplement-supplement_1.pdf]

# Figure S1

## A

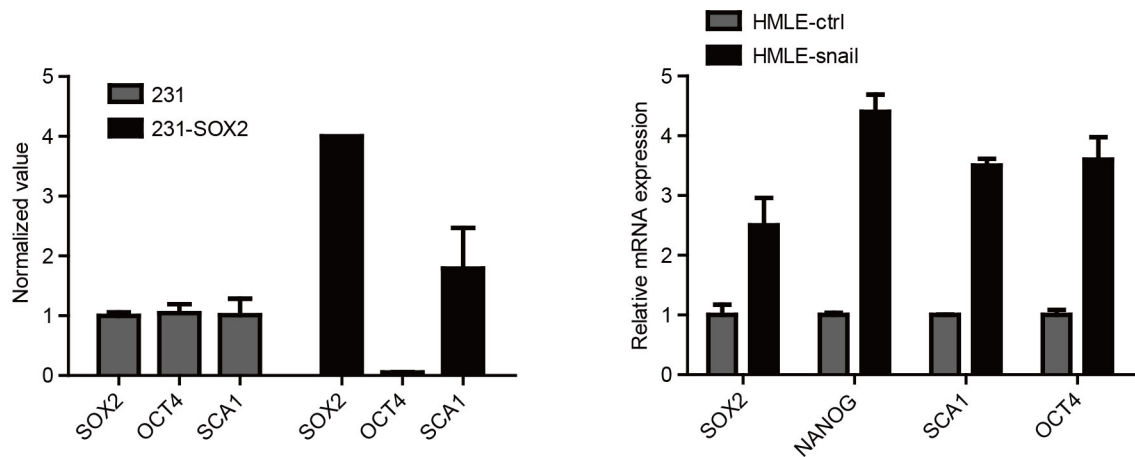

## B

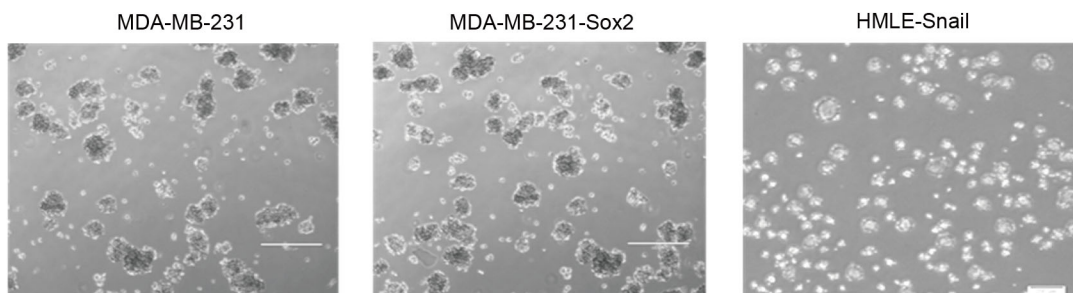

## C

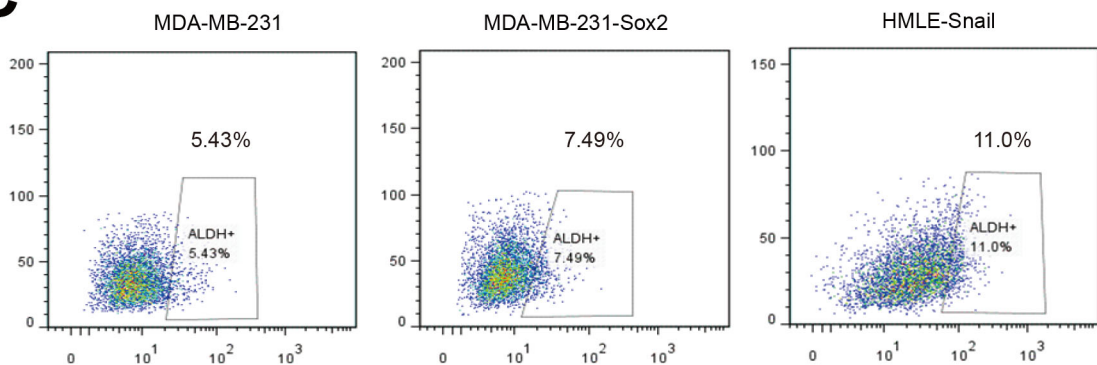

## D

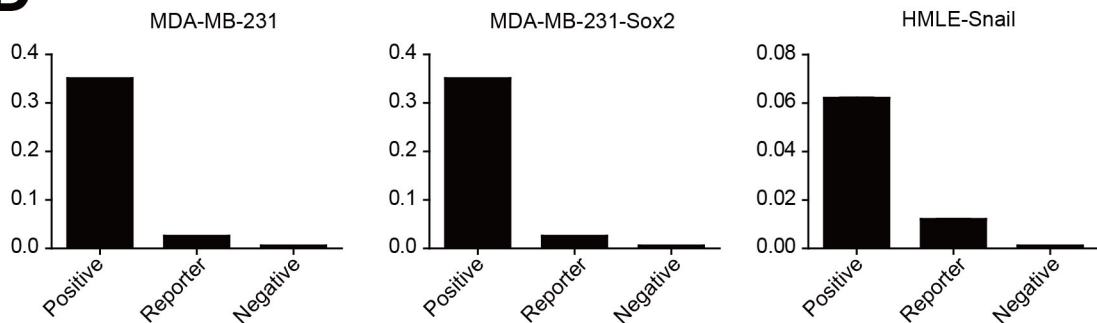

**Figure S1. HMLE-snail cell is the suitable CSCs model for high-throughput siRNA screen.**

(A) Stemness factors OCT4, SOX2, Nanog, and sca-1 were detected in MDA-MB-231, MDA-MB-231-SOX2 and HMLE-Snail cells by RT-PCR. (B) The sphere formation ability of three cell models were tested. (C) ALDH<sup>+</sup> staining assay was performed in three candidate cell models. (D) The sensitivity to dual-luciferase OCT4 reporter was studied in three cell models.

# Figure S2

## A

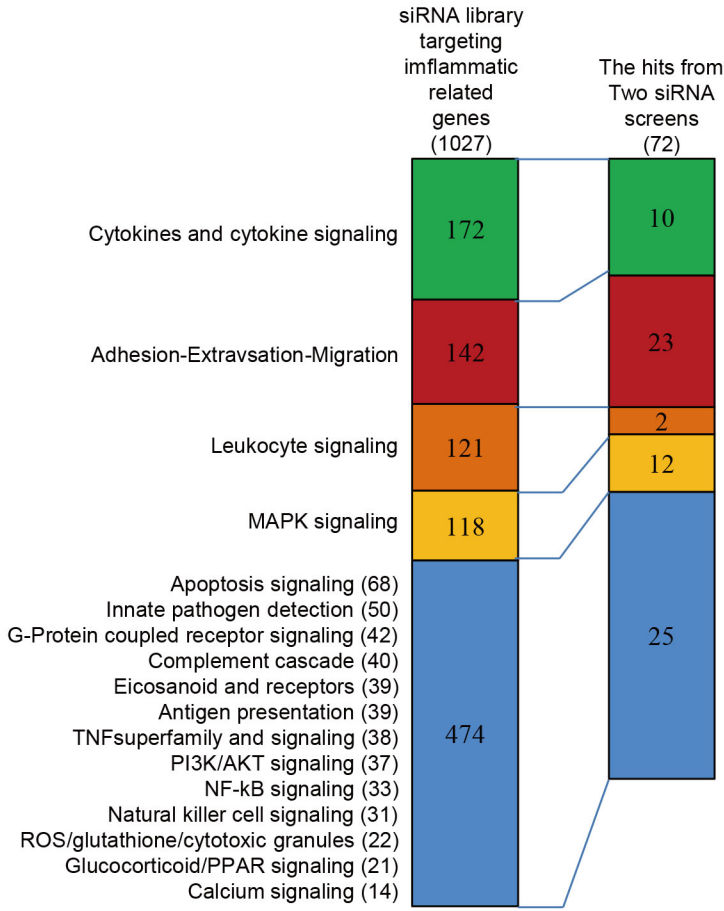

## B

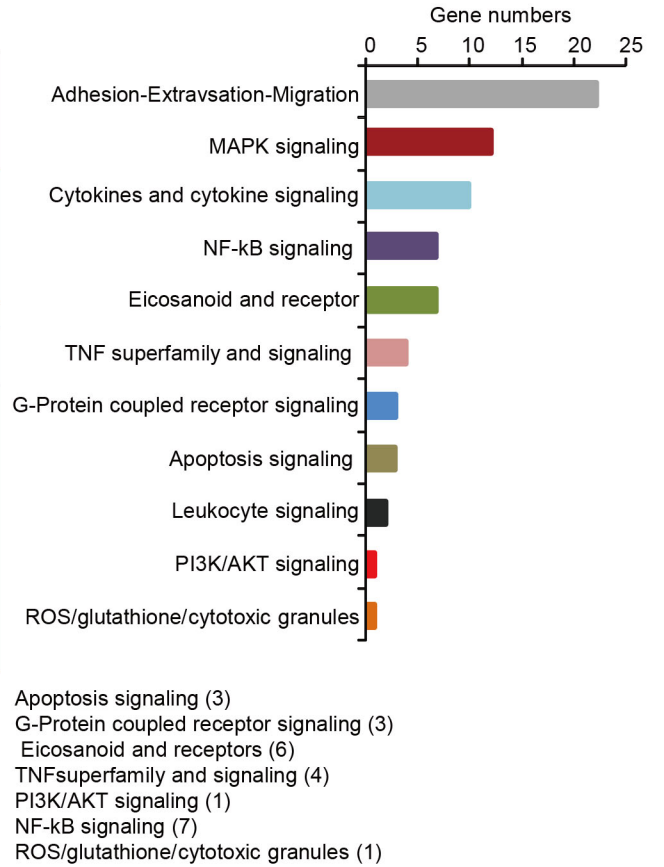

## C

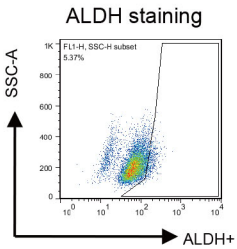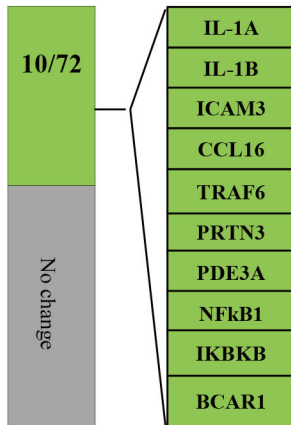

## D

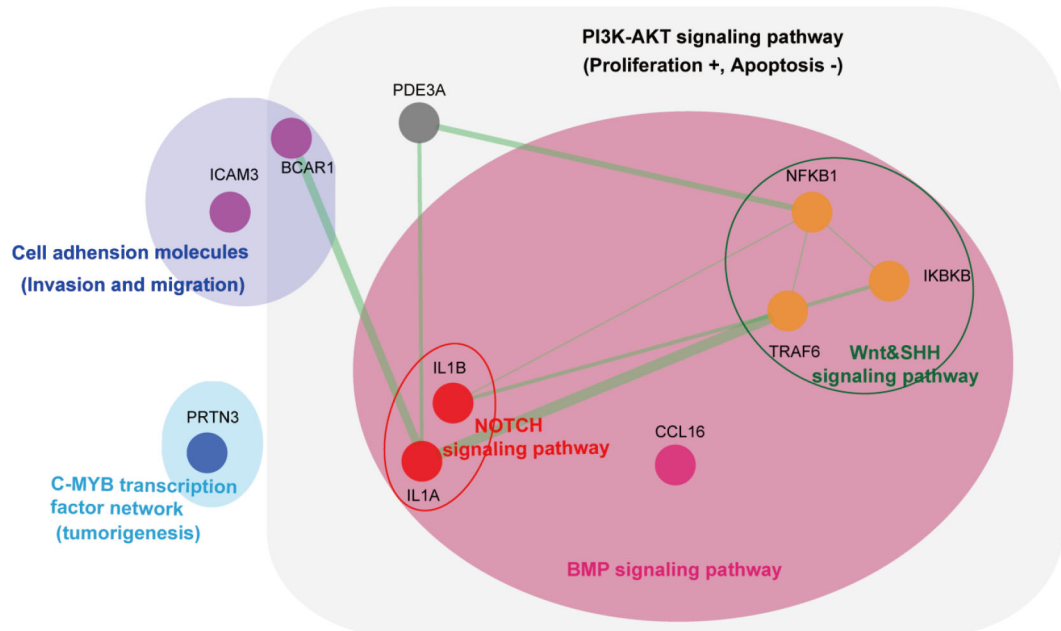

**Figure S2. Various approaches to further identify important candidates.**

(A) The pathway distribution of candidate genes. The siRNA library target 1027 inflammation genes involved in 17 functional sub-pathways of various phases of inflammation response. (B) The hits numbers in various inflammation pathways. (C) **ALDH assay was performed to screen genes which down-regulation could decrease ALDH<sup>+</sup> subpopulation in HMLE-snail cells. 10 candidates were screened out from 72 genes.** (D) The correlation of the 10 identified genes with CSC related signaling pathways including Wnt & SHH, Notch, BMP, PI3K-AKT, and C-MYB transcription factor network were analyzed.

# Supplemental Figure 3

## A

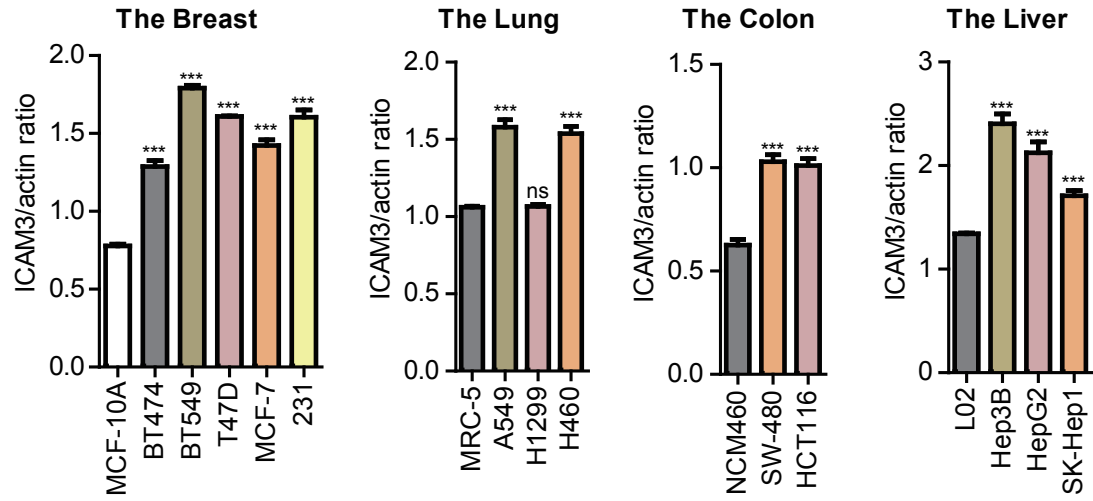

## B

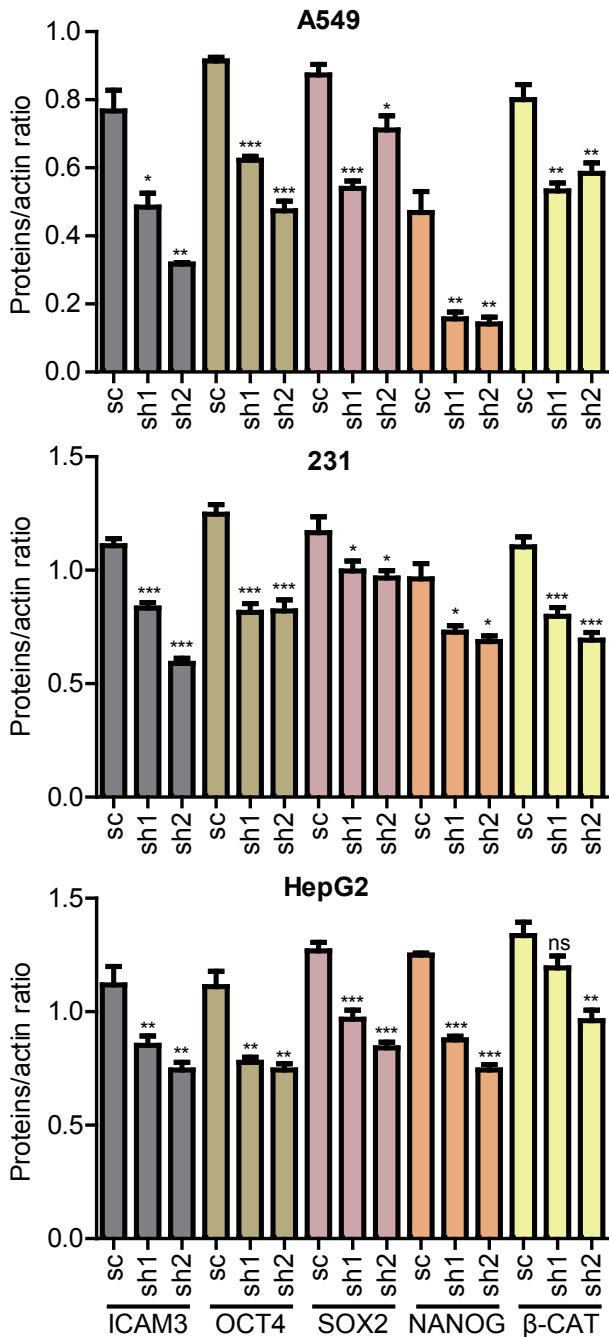

## C

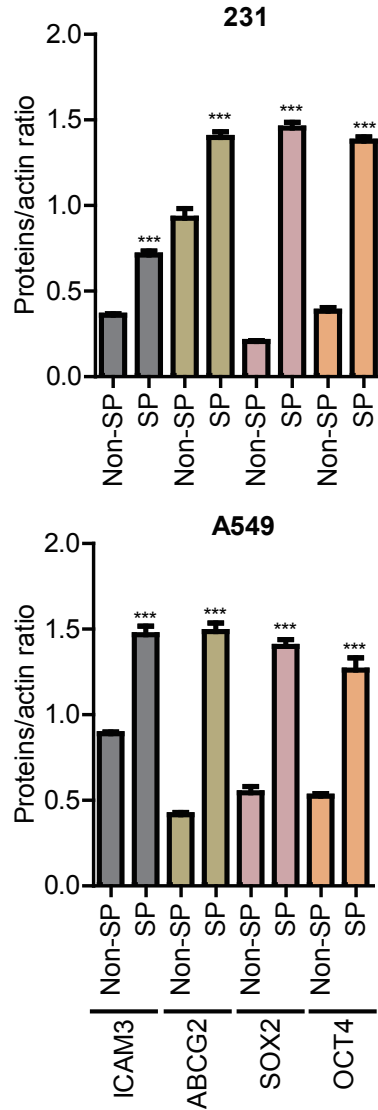

## D

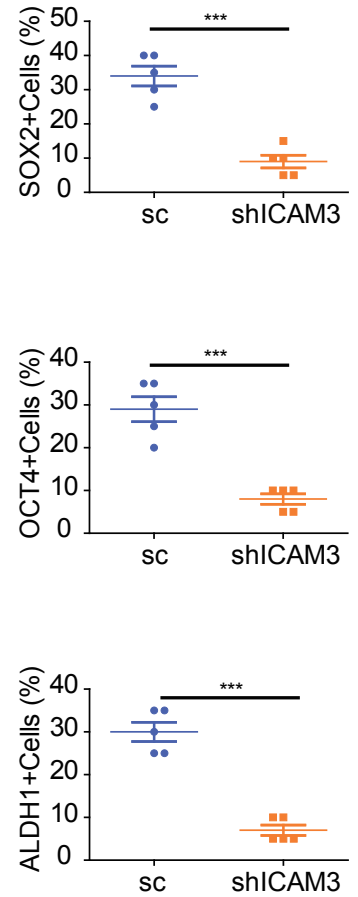

**Figure S3. Quantification results of the western blot data by three biological repeats.**

(A) Quantification results of figure 1E. (B) Quantification results of figure 2A. (C) Quantification results of figure 2E. (D) Quantification results of figure 2J. **The bar graph shows the statistical result of three separate experiments.** \*Indicates significant difference with  $P < 0.05$ , \*\*indicates significant difference with  $P < 0.01$ , \*\*\*indicates significant difference with  $P < 0.001$ .

# Supplemental Figure 4

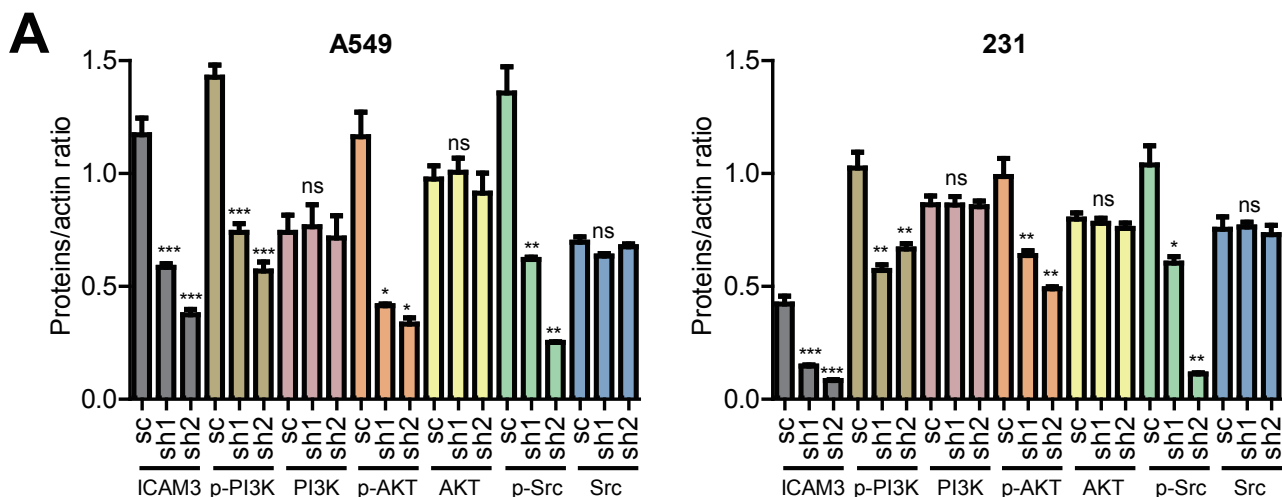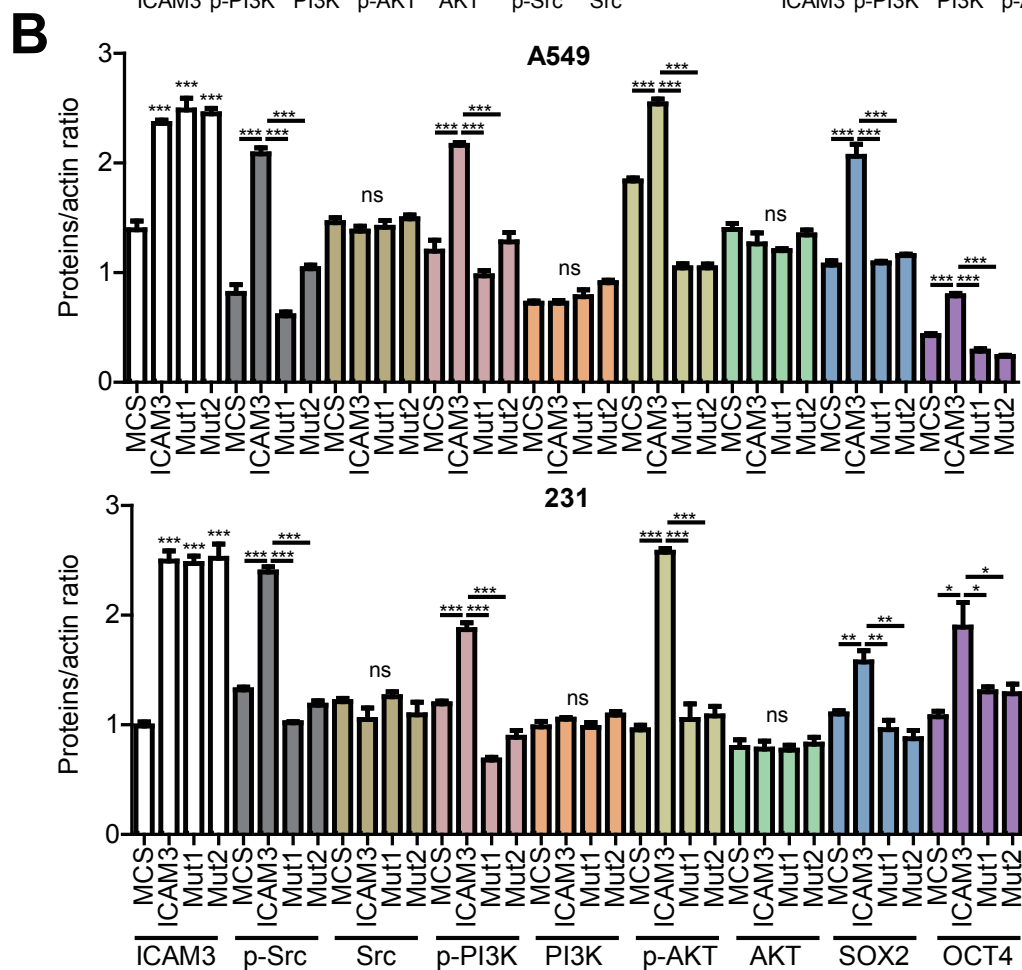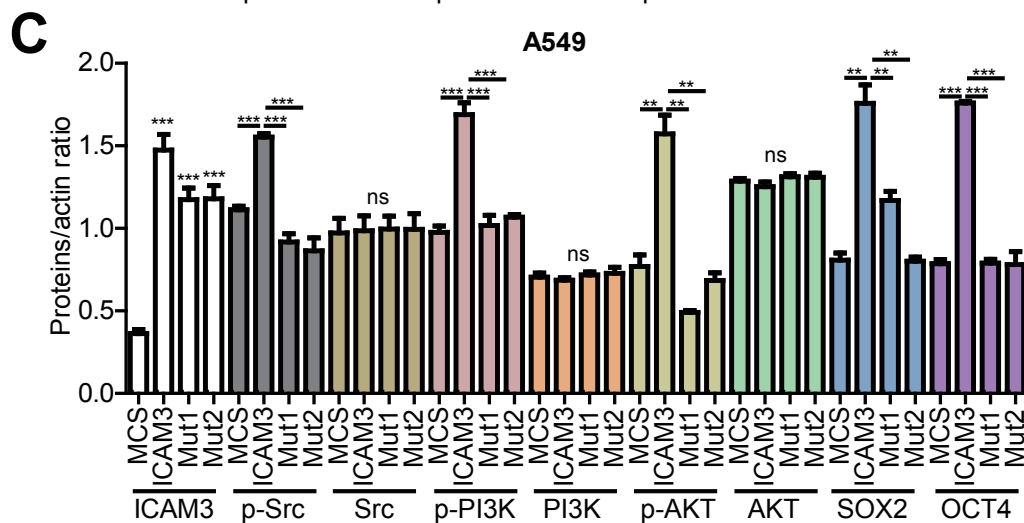

**Figure S4. Quantification results of the western blot data by three biological repeats.**

(A) Quantification results of figure 3A. (B) Quantification results of figure 3G. (C) Quantification results of figure 4B. **The bar graph shows the statistical result of three separate experiments.** \*Indicates significant difference with  $P < 0.05$ , \*\*indicates significant difference with  $P < 0.01$ , \*\*\*indicates significant difference with  $P < 0.001$ .



# Supplemental Figure 5

**A**

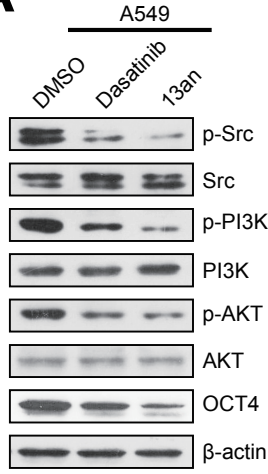

**B**

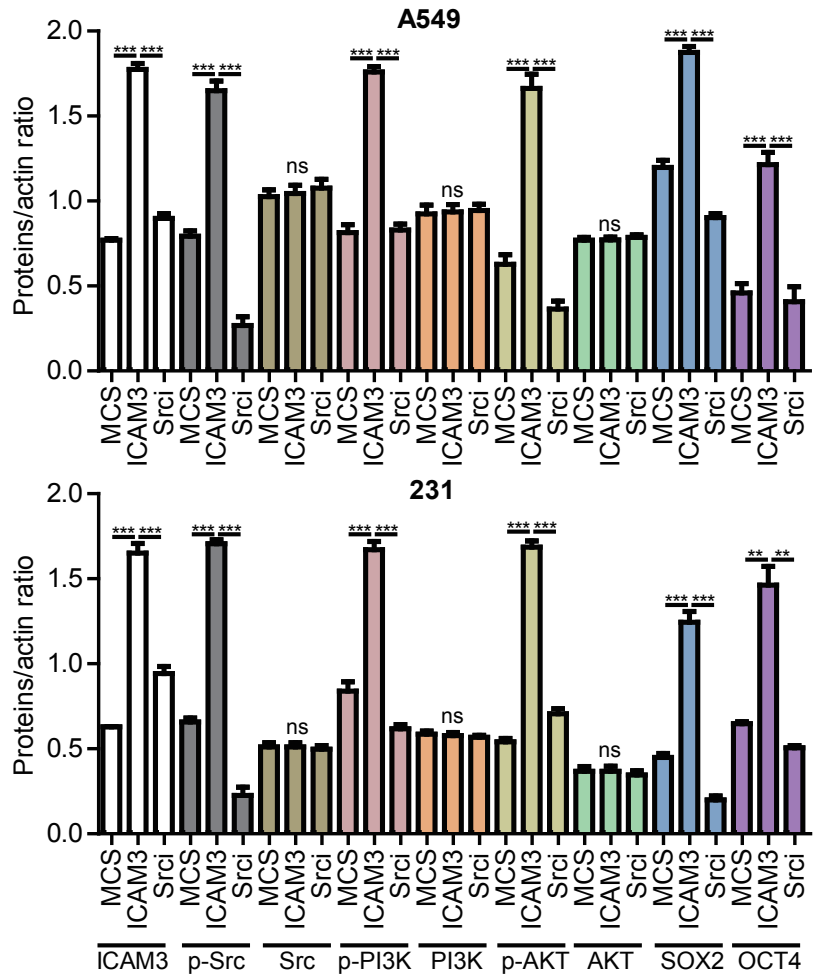

**C**

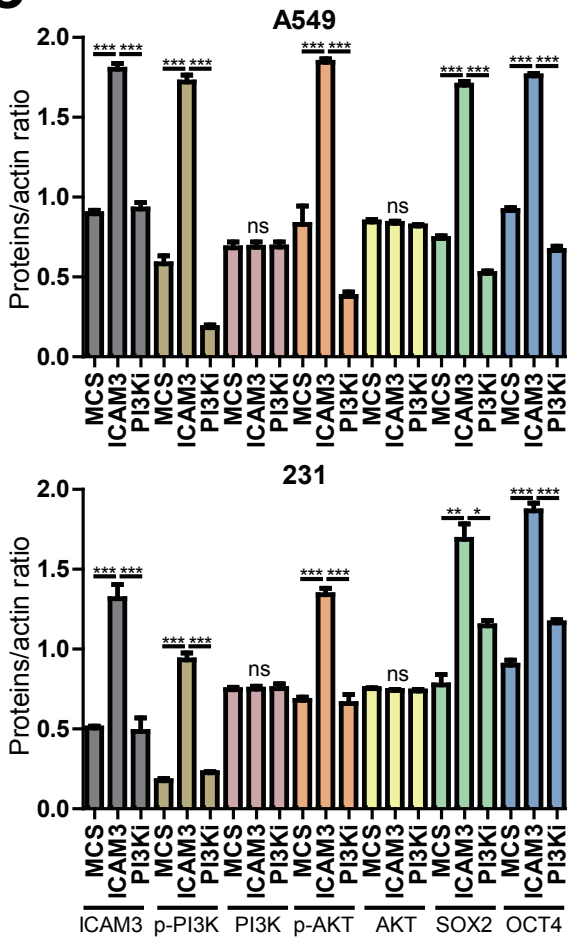

**D**

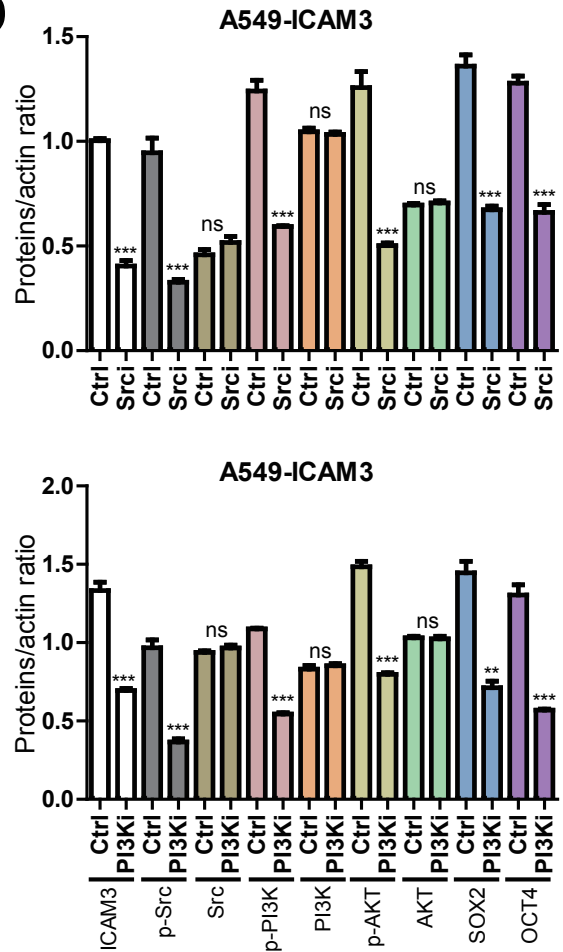

**Figure S5. Quantification results of the western blot data by three biological repeats.**

(A) Western was performed to detect the inhibition efficiency of different Src inhibitors to Src and downstream signaling activation. (B) Quantification results of figure 5A. (C) Quantification results of figure 5B. (D) Quantification results of figure 5C. **The bar graph shows the statistical result of three separate experiments.**

\*Indicates significant difference with  $P < 0.05$ , \*\*indicates significant difference with  $P < 0.01$ , \*\*\*indicates significant difference with  $P < 0.001$ .

# Supplemental Figure 6

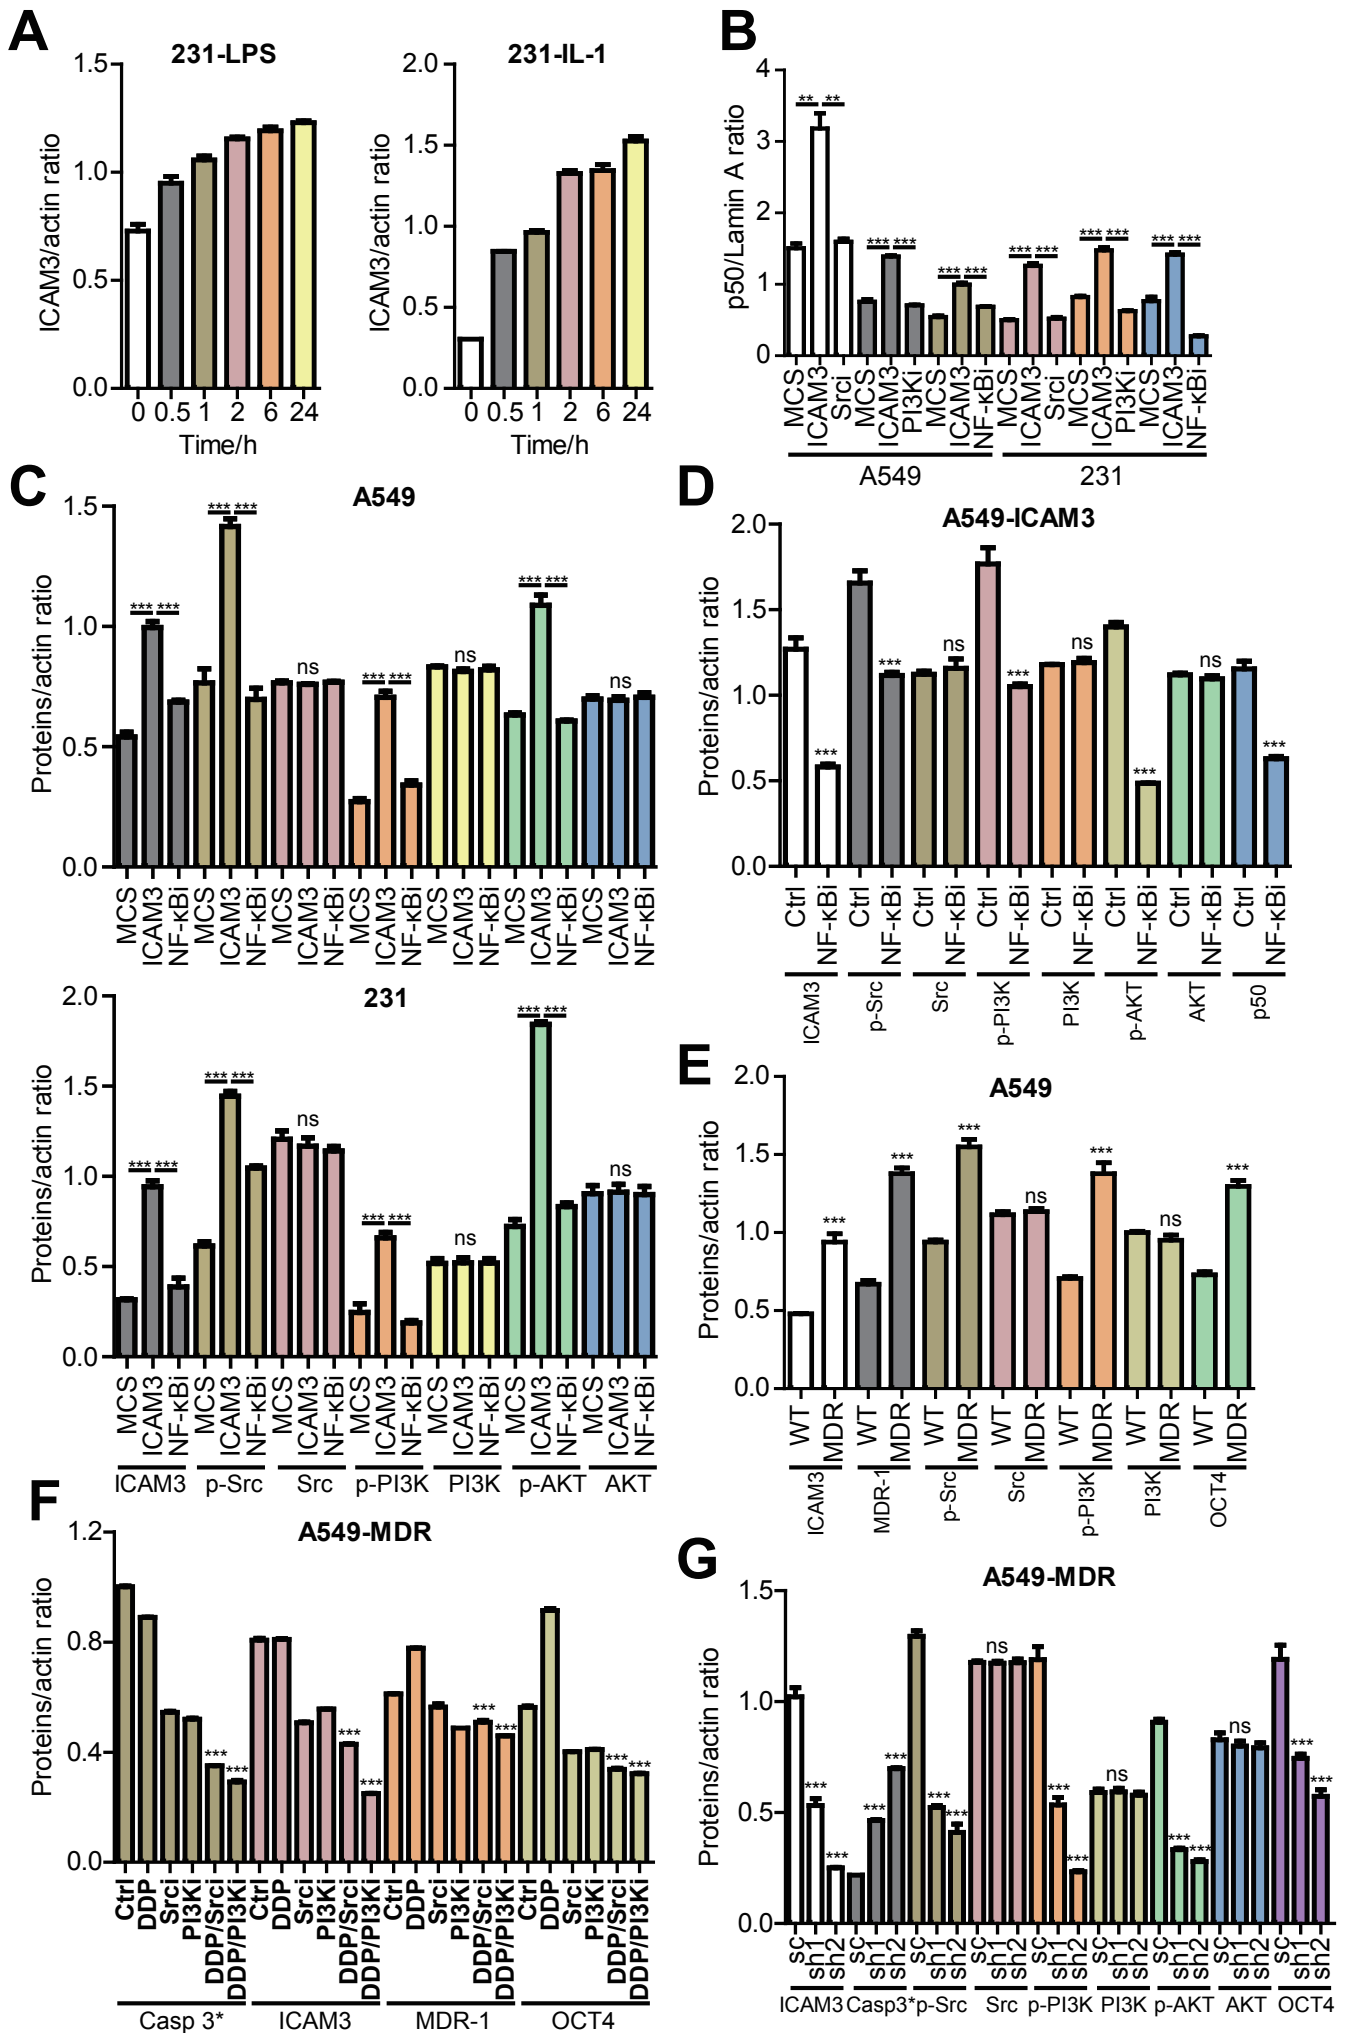

**Figure S6. Quantification results of the western blot data by three biological repeats.**

(A) Quantification results of figure 6A. (B) Quantification results of figure 6C. (C) Quantification results of figure 6D. (D) Quantification results of figure 6I. (E) Quantification results of figure 7A. (F) Quantification results of figure 7C. (G) Quantification results of figure 7G. **The bar graph shows the statistical result of three separate experiments.** \*Indicates significant difference with  $P < 0.05$ , \*\*indicates significant difference with  $P < 0.01$ , \*\*\*indicates significant difference with  $P < 0.001$ .

**Supplemental Table 1. Primer sequences**

| Name               | Sequence                                                                                  |
|--------------------|-------------------------------------------------------------------------------------------|
| ICAM3-sh1          | AAAAGCAGTACTGATTGTCCCAGCTTTGGATCCAAAGCTGGGACAATCAGT<br>ACTGC                              |
| ICAM3-sh2          | AAAAGCAATGGCTCTCAGATAACAGTTGGATCCAAGTGTATCTGAGAGCC<br>ATTGC                               |
| SC                 | AAAAGCTACACTATCGAGCAATTTTGGATCCAAAATTGCTCGATAGTGTAG<br>C                                  |
| Flag-ICAM3-F       | GCTCTAGAGCCACCATGGATTACAAGGATGACGACGATAAGAGCCCGATGG<br>CCACCATGGTACC                      |
| Flag-ICAM3-R       | CGACGCGTTCCTCACTCAGCTCTGGACGG                                                             |
| ICAM3-mut1-R       | CGACGCGTTCCTCACTCAGCTCTGGACGGTCTTCCCCATTGCTTCTGTCGGCT<br>GCATAGACGTGAGGGGCAGAGCGGTGCTCTCC |
| ICAM3-mut2-R       | CGACGCGTCTAGGTGCTCTCCTCCCTAAC                                                             |
| ICAM3-CHIP-1-<br>F | ATTGACTTAGCGCTTTCTCTGC                                                                    |
| ICAM3-CHIP-1-<br>R | TTAGGGAGTTTGAAGGCTTTATT                                                                   |
| ICAM3-CHIP-2-<br>F | GTGGGGATCCCGTTCTTC                                                                        |
| ICAM3-CHIP-2-<br>R | TCCCTGAAGACGTACATTAAGG                                                                    |
| ICAM3-CHIP-3-<br>F | CTTGACAGGAACAGTAGCG                                                                       |
| ICAM3-CHIP-3-<br>R | ACGAAGAACGGGATCCC                                                                         |

|                    |                       |
|--------------------|-----------------------|
| ICAM3-CHIP-4-<br>F | GAGGAAAGGGGAGGGC      |
| ICAM3-CHIP-4-<br>R | CGCTACTG TTCCTGTGCAAG |

**Supplemental Table 2. Antibodies**

| <b>Antibody</b>  |                   | <b>Clone, Cat #</b> | <b>Vendor</b>            | <b>City, State, Country</b> |
|------------------|-------------------|---------------------|--------------------------|-----------------------------|
| ICAM3            | Rabbit monoclonal | EPR3994, ab109405   | Abcam                    | Hong Kong, China            |
| OCT4             | Rabbit polyclonal | ab19857             | Abcam                    | Hong Kong, China            |
| Nanog            | Rabbit polyclonal | ab80892             | Abcam                    | Hong Kong, China            |
| Akt1/2/3         | Rabbit monoclonal | ab32505             | Abcam                    | Hong Kong, China            |
| SOX2             | Rabbit polyclonal | H-65, sc-20088X     | Santa Cruz Biotechnology | Santa Cruz, CA, USA         |
| $\beta$ -actin   | Mouse monoclonal  | sc-47778            | Santa Cruz Biotechnology | Santa Cruz, CA, USA         |
| ABCG2            | Mouse monoclonal  | sc-377176           | Santa Cruz Biotechnology | Santa Cruz, CA, USA         |
| MDR-1            | Mouse monoclonal  | sc-55510            | Santa Cruz Biotechnology | Santa Cruz, CA, USA         |
| $\beta$ -Catenin | Rabbit monoclonal | #8480               | Cell Signal Technology   | Danvers, MA, USA            |
| Src              | Rabbit monoclonal | 36D10, 2109s        | Cell Signal Technology   | Danvers, MA, USA            |
| p-Src(Tyr416)    | Rabbit monoclonal | D49G4, 6943t        | Cell Signal Technology   | Danvers, MA, USA            |
| p-AKT(Ser473)    | Rabbit monoclonal | D9E, 4060s          | Cell Signal Technology   | Danvers, MA, USA            |
| PI3K p85         | Rabbit monoclonal | 4292s               | Cell Signal Technology   | Danvers, MA, USA            |
| p-PI3K           | Rabbit monoclonal | 4228s               | Cell Signal Technology   | Danvers, MA, USA            |
| Caspase3         | Rabbit monoclonal | 9662s               | Cell Signal Technology   | Danvers, MA, USA            |
| Lamin A/C        | Rabbit polyclonal | A01455-40           | GenScript                | Piscataway, NJ, USA         |
| P50              | Rabbit polyclonal | 14220-1-AP          | Proteintech              | Rosemont, CHI, USA          |

Supplemental table 3

| <b>Cytokines<br/>&amp; cytokine<br/>signaling</b> | <b>Adhesion<br/>Extravasation<br/>Migration</b> | <b>Leukocyte<br/>signaling</b> | <b>MAPK<br/>signaling</b> | <b>Others</b> |
|---------------------------------------------------|-------------------------------------------------|--------------------------------|---------------------------|---------------|
| <b>(10)</b>                                       | <b>(23)</b>                                     | <b>(2)</b>                     | <b>(12)</b>               | <b>(25)</b>   |
| STAT2                                             | CTTN                                            | SLAMF7                         | RAPGEF3                   | PLA2G2A       |
| SOCS3                                             | MMP7                                            | LAT                            | EEF2K                     | ALOX5AP       |
| IL1A                                              | MMP10                                           |                                | BCAR1                     | MGST2         |
| IL1B                                              | SELPLG                                          |                                | MAP2K4                    | PTGER4        |
| TGIF2                                             | PXN                                             |                                | KSR1                      | TBXAS1        |
| IL17RA                                            | ITGAX                                           |                                | PRKCA                     | PTGS1         |
| PDGFB                                             | MYH10                                           |                                | MEF2B                     | RGS1          |
| IL12A                                             | CCL8                                            |                                | MEF2C                     | PDE3A         |
| CSF2                                              | CCL13                                           |                                | YWHAG                     | PDE4C         |
| IFNB1                                             | CCL1                                            |                                | DUSP4                     | HSP90B1       |
|                                                   | CCL5                                            |                                | ELK1                      | KIAA1271      |
|                                                   | CCL16                                           |                                | DUSP9                     | RELA          |
|                                                   | CCR7                                            |                                |                           | NFRKB         |
|                                                   | ITGA3                                           |                                |                           | BCL3          |
|                                                   | ICAM2                                           |                                |                           | EIF2AK2       |
|                                                   | PECAM1                                          |                                |                           | NFKB1         |
|                                                   | ICAM1                                           |                                |                           | IKBKB         |
|                                                   | ICAM5                                           |                                |                           | AKT2          |
|                                                   | ICAM3                                           |                                |                           | PRTN3         |
|                                                   | CEACA5                                          |                                |                           | TNFRSF9       |
|                                                   | CCR2                                            |                                |                           | LTBR          |
|                                                   | CCRL2                                           |                                |                           | TNFRSF12A     |
|                                                   | ALCAM                                           |                                |                           | BBC3          |
|                                                   | ICAM1                                           |                                |                           | BCL2L12       |
|                                                   | ICAM2                                           |                                |                           | CASP10        |
|                                                   | ICAM3                                           |                                |                           |               |
|                                                   | ICAM5                                           |                                |                           |               |
|                                                   | ALCAM                                           |                                |                           |               |
|                                                   | PECAM1                                          |                                |                           |               |
|                                                   | CEACAM5                                         |                                |                           |               |
|                                                   | ITGA3                                           |                                |                           |               |
|                                                   | ITGAX                                           |                                |                           |               |
|                                                   | SELPLG                                          |                                |                           |               |
|                                                   | PXN                                             |                                |                           |               |



**Supplemental table 3. 72 hit genes from twice high throughput siRNA screen.**

The 72 hit genes from twice high throughput siRNA screen were listed in the table and they were divided into 5 groups including cytokines & cytokine signaling molecules, adhesion-extravasation-migration pathway molecules, leukocyte signaling molecules, MAPK signaling molecules and others.
